# Supplementary material
Source: publisher figshare collection journal article supplement (https://asha.figshare.com/ndownloader/files/33966770)
Supplement: Supplementary file 1 [file 33966770]

**Supplemental Material S1.** Instructions, scoring tables, and scoring rubrics for graduate school application components used by the Department of Communication Sciences and Disorders in the 2017–2018, 2018–2019, and 2019–2020 application cycles.

### Scoring table for Communication Sciences & Disorders GPA

- Weight = 20% of overall composite score
- Compute GPA for all CSD courses completed to date
- Convert from continuous scale to interval scale using the following table:

| CSD GPA   | Points |
|-----------|--------|
| < 3.25    | 0      |
| 3.25–3.34 | 2      |
| 3.35–3.44 | 2.5    |
| 3.45–3.54 | 3      |
| 3.55–3.64 | 3.5    |
| 3.65–3.74 | 4      |
| 3.75–3.84 | 4.5    |
| 3.85–3.94 | 5      |
| 3.95–3.99 | 5.5    |
| 4.0       | 6      |

### Scoring table for Undergraduate GPA

- Weight = 10% of overall composite score
- Compute GPA for all undergraduate courses completed to date
- Convert from continuous scale to interval scale using the following table:

| U GPA     | Points |
|-----------|--------|
| < 2.75    | 0      |
| 2.75–2.99 | 0.25   |
| 3.00–3.09 | 0.5    |
| 3.10–3.19 | 0.75   |
| 3.20–3.29 | 1      |
| 3.30–3.39 | 1.25   |
| 3.40–3.49 | 1.5    |
| 3.50–3.59 | 1.75   |
| 3.60–3.69 | 2      |
| 3.70–3.79 | 2.25   |
| 3.80–3.89 | 2.5    |
| 3.90–3.99 | 2.75   |
| 4.0       | 3      |

### Scoring table for each of the three GRE tests (Verbal Reasoning GRE, Quantitative Reasoning GRE, and Analytical Writing GRE)

- Total weight of all three GRE tests is 20% of overall composite score
- Weight of each GRE test = 6.7% of overall composite score
- For each GRE test, convert percentile from continuous scale to interval scale using the following table:

| GRE percentile | Points |
|----------------|--------|
| 0–10           | 0.2    |
| 10–19          | 0.4    |
| 20–29          | 0.6    |
| 30–39          | 0.8    |
| 40–49          | 1      |
| 50–59          | 1.2    |

| GRE percentile | Points |
|----------------|--------|
| 60–69          | 1.4    |
| 70–79          | 1.6    |
| 80–89          | 1.8    |
| 90–100         | 2      |

## Instructions & Scoring Rubric for Letters of Recommendation

- Weight = 30% of overall composite score
- Applicants are expected to obtain three letters of recommendation. Requirements are specified on the department website: Follow instructions on the CSDCAS site for submission of three (3) letters of recommendation. At least two must come from CSD Instructors or Clinical Supervisors.
- Recommenders upload letters to CSDCAS and complete standard CSDCAS recommendation form.
- Two faculty raters independently score each of three letters with the rubric provided.
- Average score for each rater found.
- Sum of two averaged ratings used as score.

|                                                                                                             |        |
|-------------------------------------------------------------------------------------------------------------|--------|
| Above Average letter or something in the letter makes the students standout                                 | 5 or 6 |
| Average letter                                                                                              | 4      |
| Letter has negative tone or some other indication of concern (needs support or recommend with reservations) | 0–3    |

## Instructions & Scoring Rubric for Personal Statements (aka Letter of Intention)

- Weight = 10% of overall composite score
- Applicants follow instructions on the CSDCAS site for submission of a personal statement that addresses three writing prompts:
  - What aspect of the profession interests you most, and why?
  - What makes you a good match for our program?
  - Describe a challenging collaborative experience you have had and how you worked through the experience.
- Two faculty raters independently score the personal statement with the rubric provided.
- Sum of two ratings used as score.

|                                                                   |        |
|-------------------------------------------------------------------|--------|
| Standout letter                                                   | 5 or 6 |
| Generic/Average letter                                            | 4      |
| Minor errors: minimal grammatical errors; questionable content    | 3      |
| Did not address writing prompts or significant grammatical errors | 0–2    |

## Scoring Table for Prerequisite Coursework

- Weight = 10% of overall composite score
- Review transcript to identify all completed & in-progress prerequisite courses.
- Assign score corresponding to the number of missing prerequisites. *Note:* The scoring table used for this component varied across application cycles. Therefore, prerequisite coursework was not analyzed in the study.
- If admitted, applicant will be expected to complete any missing courses during their program. This increases the applicant’s course load.
